# Supplementary material for: ty-5 Confers Broad-Spectrum Resistance to Geminiviruses
Source: MDPI journal article supplement (doi:10.3390/v14081804), 2022-08-17
Supplement: s1 [file s1]

Supplemental Materials:

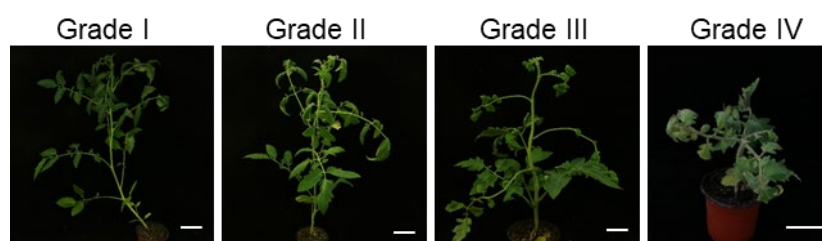

**Figure S1.** Disease symptoms from grade I (no symptoms) to grade IV (very severe symptoms).

**Table S1.** Primers used in this study.

| Purpose                                                                                                                              | Primers         | Sequence (5'-3')                                             |
|--------------------------------------------------------------------------------------------------------------------------------------|-----------------|--------------------------------------------------------------|
| To quantify the DNA titer of 25SRNA                                                                                                  | Nb-25S RNA F    | CCGAAGTTACGGATCCATT                                          |
|                                                                                                                                      | Nb-25S RNA R    | CCGAAGTTACGGATCCATT                                          |
| To quantify the DNA titer of TYLCV                                                                                                   | qTYLCV-V1 F     | CCGGAAGCCCAGAATATACAG                                        |
|                                                                                                                                      | qTYLCV-V1 R     | ATCCCGATGCTCATAAGACTG                                        |
| To quantify the DNA titer of Y10                                                                                                     | qTYLCCNV-V1 F   | AGAAGACAAATGTGGTCCAACAGG                                     |
|                                                                                                                                      | qTYLCCNV-V1 R   | GCAATTAAAGACTTGTTGGAAATCCAT                                  |
| To quantify the DNA titer of TbLCYnV                                                                                                 | qTbLCYnV-V1 F   | TGATGTTCCGAAGGGTTGTG                                         |
|                                                                                                                                      | qTbLCYnV-V1 R   | AACCTCTTACCAACTCGATGC                                        |
| To quantify the DNA titer of BCTV                                                                                                    | qBCTV-V1 F      | TGATATGTTGGGTGCTGGTG                                         |
|                                                                                                                                      | qBCTV-V1 R      | AACTTCAAATGCTTCGTCACAG                                       |
| To detect TYLCV                                                                                                                      | sTYLCV F        | TGACTATGTCTGAAGCGACCA                                        |
|                                                                                                                                      | sTYLCV R        | CATTACAGCCTCAGACTGGT                                         |
| To detect TbLCYnV                                                                                                                    | sTbLCYnV F      | ATGTGGGATCCTTTACTCAACGAG                                     |
|                                                                                                                                      | sTbLCYnV R      | TGTTGAAAATCCATCGGAGTACCAC                                    |
| To detect TYLCCNV                                                                                                                    | sTYLCCNV F      | ATGGCAGAAGGTGAGGAAATTCAGC                                    |
|                                                                                                                                      | sTYLCCNV R      | TTAGAAGCATTTTCTGTGAACAATT                                    |
| To detect BCTV                                                                                                                       | sBCTV F         | ATGGATTTGGGCGGGAACTTC                                        |
|                                                                                                                                      | sBCTV R         | GCCAAACAAAGTGGCATACAT                                        |
| To amplify the <i>Pelota</i> gene fragment, which was cloned into the RNAi vector using the infusion method                          | F-RNAi-Pelota F | <u>ATCCGAGCTCGACGACAAGACCCGGG</u> ATCAGTTTCATCGTCACC<br>TGAC |
|                                                                                                                                      | F-RNAi-Pelota R | <u>AGAAAATAATTATTTCTTACCCCGGG</u> CAGTAATGAGAAGTGTCT<br>GG   |
| To amplify the reversed <i>Pelota</i> gene fragment, which was cloned into RNAi vector using the <i>Mlu</i> I and <i>Sal</i> I sites | R-RNAi-Pelota F | <u>ACGCGT</u> CAGTAATGAGAAGTGTCTGG                           |
|                                                                                                                                      | R-RNAi-Pelota R | <u>GTCGACAT</u> CAGTTTCATCGTCACCTG                           |
